# Supplementary material for: Comparison of Cost Analysis in Patients with Tetrahydrobiopterin-Responsive and Non-responsive Phenylketonuria
Source: Preprints.org preprint supplement (doi:10.20944/preprints202312.0425.v1), 2023-12-06
Supplement: Supplementary file 1 [file supplementary]

**Supplement Table 1. Comparison of the state's economic damage by age groups**

| **Age groups** | **N** | **Mean±SD (Median) (Min-Max) (€/year)** | **p value** |
| --- | --- | --- | --- |
| **1-3** | 37 | 20177±8578 (10660) (487-29942) | 0.006 |
| **3-12** | 67 | 22558±16025 (20663) (352-75953) |
| **12<** | 15 | 17829±20190 (10187) (3410-67664) |  |
| **Overall** | 119 | 18801±15345 (15834) (352-75953) |  |
| Mean ± SD, median and min-max values are given as €/year | | | |

| **Treatment** | **Values** | **BH4** | **Phe-free formula and milk** | **Test** | **Examination** | **Special Education and Rehabilitation** | **Hospitalization** | **Other medications** | **Diaper** | **Overall damage** | **p**  **value*** |
| --- | --- | --- | --- | --- | --- | --- | --- | --- | --- | --- | --- |
| **Diet** | **Mean±SD** |  | 6859±3895 | 62±38 | 260±114 | 793±392 | 38±38 | 1558±3697 | 316±264 | 7914±4930 | <0.001* |
| **Median (n)** |  | 6674 (47) | 52 (50) | 55 (50) | 974 (6) | 25 (5) | 189 (7) | 317 (2) | 7860 (50) |
| **Min-Max** |  | 872-20800 | 24-172 | 55-500 | 255-1229 | 4-100 | 31-9941 | 130-504 | 352-23528 |
| **BH4** | **Mean±SD** | 20177±12505 |  | 75±43 | 294±106 |  | 38±32 |  |  | 20566±12465 |
| **Median (n)** | 16163 (44) |  | 62 (44) | 300 (44) |  | 24 (6) |  |  | 16757 (44) |
| **Min-Max** | 3776-64652 |  | 24-170 | 111-412 |  | 12-116 |  |  | 4352-64896 |
| **BH4**  **+**  **Diet** | **Mean±SD** | 31208±13537 | 5515±2516 | 73±43 | 379±334 | 777±277 | 44±35 |  |  | 37470±14628 |
| **Median (n)** | 32326 (25) | 4720 (25) | 64 (25) | 396 (25) | 778 (2) | 44 (2) |  |  | 36254 (25) |
| **Min-Max** | 11330-64652 | 2325-10893 | 24-213 | 103-1907 | 581-974 | 19-69 |  |  | 16704-75953 |
| **Overall** | **Mean±SD** | 24174±13859 | 6392±3519 | 69±41 | 297±185 | 789±348 | 39±36 | 1558±3697 | 316±264 | 18801±15345 |
| **Median (n)** | 24244 (69) | 5697 (72) | 59 (119) | 300 (119) | 974 (8) | 25 (13) | 189 (7) | 317 (2) | 15834 (119) |
| **Min-Max** | 3776-64652 | 873-20800 | 24-213 | 55-1907 | 255-1229 | 4-116 | 31-9941 | 130-504 | 352-75953 |

**Supplement Table 2. Analysis of the state's economic damage in subgroups**

Mean ± SD, median and min-max values are given as €/year.

| **Supplement Table 3. Non-medical economic damage to the families (exluding food fee)** | | | | | | | | |
| --- | --- | --- | --- | --- | --- | --- | --- | --- |
| **Treatment** | | | **Transportation** | **Out-of-pocket**  **in hospital** | **Parking** | **Shipping** | **Day care for patient with PKU** | **Day care for siblings** |
| **Diet** | Mean±SD (n) | 227±362 (50) | | 82±91 (46) | 44±30 (27) | 88±91 (7) |  | 2158 |
| Median (min-max) | 103 (5-2275) | | 53 (5-470) | 45 (5-88) | 58 (29-288) |  | 2158 |
| **BH4** | Mean±SD (n) | 273±305 (42) | | 63±77(42) | 46±36 (19) | 108±7 (3) | 1439±1017(2) |  |
| Median (min-max) | 43 (10-1487) | | 35 (1-326) | 43 (2-88) | 108 (100-115) | 1439 (719-1439) |  |
| **BH4**  **+**  **Diet** | Mean±SD (n) | 334±455 (25) | | 83±141 (21) | 44±35 (11) | 161 (1) | 2662±3561 (2) |  |
| Median (min-max) | 146 (24-1833) | | 882 (2-624) | 32 (3-86) | 161 | 2662 (144-5180) |  |
| **Overall** | Mean±SD (n) | 266±364 (117) | | 75±98 (109) | 45±32(57) | 100±74 (11) | 2050±2251 (4) | 2158 |
| Median (min-max) | 114 (5-2275) | | 41 (1-624) | 45 (2-88) | 86 (29-288) | 1439 (144-5180) | 2158 |
| Mean ± SD, median and min-max values are given as €/year. | | | | | | | | |

| **Supplement Table 4. Fees of low-protein foods** | | | | | | | | | |
| --- | --- | --- | --- | --- | --- | --- | --- | --- | --- |
| **Low-protein food** | **Diet** | | | |  | **BH4 + Diet** | | | |
| n | Mean±SD | Median | Min-max |  | n | Mean±SD | Median | Min-max |
| **Bread** | 31 | 2±2.8 | (1) | (0.1-12) |  | 13 | 0.8±0.7 | (0.6) | (0.2-2.6) |
| **Flour** | 35 | 1.3±1 | (1.2) | (0.1-4.3) |  | 20 | 2.6±2.6 | (1.5) | (0.4-9.6) |
| **Rice** | 27 | 3±3 | (2) | (0.2-11.5) |  | 14 | 3.2±2.5 | (2.9) | (0.7-11) |
| **Pasta** | 35 | 4±3.5 | (3) | (0.5-13) |  | 19 | 3.4±3 | (2) | (0.3-10) |
| **Egg** | 17 | 1.2±1 | (1) | (0.5-4) |  | 13 | 1.3±1.5 | (0.6) | (0.2-5) |
| **Meat** | 26 | 3.1±3 | (2) | (0.5-11.5) |  | 13 | 4±3.7 | (3) | (0.5-15) |
| **Other products** | 44 | 10±8.7 | (8) | (0.3-36) |  | 23 | 11.7±10.7 | (10) | (0.5-44) |
| Mean ± SD, median and min-max values are given as €/week. | | | | | | | | | |

| **Supplement Table 5. Fees of normal foods** | | | | | | | | | | | | | | |
| --- | --- | --- | --- | --- | --- | --- | --- | --- | --- | --- | --- | --- | --- | --- |
| **Normal foods** | **Diet** | | | |  | **BH4** | | | |  | **BH4 + Diet** | | | |
| n | Mean±SD | Median | Min-max |  | n | Mean±SD | Median | Min-max |  | n | Mean±SD | Median | Min-max |
| **Vegetable** | 46 | 2.2±1.4 | (2) | (0.5-6.6) |  | 42 | 1±0.6 | (0.9) | (0.1-2.6) |  | 25 | 1.8±0.9 | (1.8) | (0.3-3.7) |
| **Fruit** | 46 | 1.4±0.7 | (1.2) | (0.5-3.4) |  | 42 | 1±0.7 | (0.9) | (0.1-3) |  | 25 | 1.4±0.7 | (1.3) | (0.2-3.4) |
| **Meat** | 2 | 3.6±0 | (3.6) | (3.6) |  | 38 | 3±2.2 | (2.4) | (0.6-11.7) |  | 1 | 4±0 | (4) | (4.2) |
| **Milk** | 14 | 0.6±0.5 | (0.5) | (0.06-1.7) |  | 41 | 1.7±0.8 | (1.6) | (0.1-4.6) |  | 12 | 1.2±1.2 | (0.8) | (0.1-4.3) |
| **Flour** | 9 | 0.5±0.5 | (0.4) | (3±1.6) |  | 40 | 0.5±0.5 | (0.3) | (0.1-2) |  | 8 | 0.6±0.6 | (0.3) | (0.1-2) |
| **Formula** | 2 | 3.7±3.9 | (3.7) | (1-6.5) |  | 8 | 4.8±8.3 | (2.5) | (0.4-25) |  | 1 | 0.9±0 | (0.8) | (0.9) |
| **Ready-to-eat** | 28 | 0.8±0.6 | (0.5) | (0.2-2.4) |  | 40 | 2±1.8 | (1.4) | (0.1-6) |  | 16 | 1±0.9 | (1.2) | (0.3-3.6) |
| **Other foods** | 39 | 2±1.4 | (1.4) | (0.2-5.5) |  | 41 | 2±1 | (1.9) | (0.3-5) |  | 20 | 1.5±1.5 | (1) | (0.2-5.9) |
| Mean ± SD, median and min-max values are given as €/week. | | | | | | | | | | | | | | |
